# Supplementary material
Source: Springer Nature journal article supplement (https://www.springermedizin.de/resource/supplementary/12955_2013_1161_MOESM1_ESM.pdf/9558924)
Supplement: MOESM1 [file 9558924]

# Patient Outcomes Assessment Sources and Examples

Survival

Physiological

Clinician-reported

Caregiver-reported

Patient-reported

## For example

Survival curve

FEV1

HbA1c

Tumor size

Bone density

Cholesterol level

Global impression

Observation and test of functions

Morbid events  
(stroke, MI, hip fracture, etc)

Clinical events  
(hospitalization, coronary artery bypass surgery, etc)

Toxicity

Global impression

Morbid events

Clinical events

Dependency

Functional status

Symptoms

Global impression

Dependency

Well being

HRQoL

Satisfaction with treatment

Treatment adherence
